# Supplementary material for: Fear conditioning biases olfactory sensory neuron frequencies across generations
Source: bioRxiv preprint, doi:10.1101/2023.02.23.529692, version 5 (2026-02-26)
Supplement: Supplementary File 2 [file 529692_file10.xlsx]

## Sheet: Figure S1
Table S2.1) Statistical Source Data Related To Figure S1
Panel	Data Analyzed	Primary Analysis	n	Post-Hoc Analysis	Comparison	P value	Statistic
A	M71 OSN Counts (by sex)	2-way ANOVA	61		Treatment	P<0.0001	F (4, 55) = 34.81
					Sex	0.0425	F (1, 55) = 4.314
				Tukey's mulriple comparisons test	Male:Naïve vs. Male:F0 Unpaired	0.8871
					Male:Naïve vs. Male:F0 Paired	<0.0001
					Male:Naïve vs. Male:F1 Unpaired	0.9886
					Male:Naïve vs. Male:F1 Paired	<0.0001
					Male:Naïve vs. Female:Naïve	0.5508
					Male:Naïve vs. Female:F0 Unpaired	0.5011
					Male:Naïve vs. Female:F1 Unpaired	0.5531
					Male:Naïve vs. Female:F1 Paired	<0.0001
					Male:F0 Unpaired vs. Male:F0 Paired	<0.0001
					Male:F0 Unpaired vs. Male:F1 Unpaired	>0.9999
					Male:F0 Unpaired vs. Male:F1 Paired	<0.0001
					Male:F0 Unpaired vs. Female:Naïve	>0.9999
					Male:F0 Unpaired vs. Female:F0 Unpaired	0.5508
					Male:F0 Unpaired vs. Female:F1 Unpaired	0.9962
					Male:F0 Unpaired vs. Female:F1 Paired	<0.0001
					Male:F0 Paired vs. Male:F1 Unpaired	<0.0001
					Male:F0 Paired vs. Male:F1 Paired	>0.9999
					Male:F0 Paired vs. Female:Naïve	<0.0001
					Male:F0 Paired vs. Female:F0 Unpaired	0.0004
					Male:F0 Paired vs. Female:F1 Unpaired	<0.0001
					Male:F0 Paired vs. Female:F1 Paired	0.9933
					Male:F1 Unpaired vs. Male:F1 Paired	<0.0001
					Male:F1 Unpaired vs. Female:Naïve	>0.9999
					Male:F1 Unpaired vs. Female:F0 Unpaired	0.9069
					Male:F1 Unpaired vs. Female:F1 Unpaired	0.5508
					Male:F1 Unpaired vs. Female:F1 Paired	<0.0001
					Male:F1 Paired vs. Female:Naïve	<0.0001
					Male:F1 Paired vs. Female:F0 Unpaired	0.0071
					Male:F1 Paired vs. Female:F1 Unpaired	0.0001
					Male:F1 Paired vs. Female:F1 Paired	0.5508
					Female:Naïve vs. Female:F0 Unpaired	0.8871
					Female:Naïve vs. Female:F1 Unpaired	0.9886
					Female:Naïve vs. Female:F1 Paired	<0.0001
					Female:F0 Unpaired vs. Female:F1 Unpaired	>0.9999
					Female:F0 Unpaired vs. Female:F1 Paired	<0.0001
					Female:F1 Unpaired vs. Female:F1 Paired	<0.0001
B	MOR23 OSN Counts (by sex)	2-way ANOVA	37		Treatment	P<0.0001	F (4, 31) = 29.42
					Sex	0.7206	F (1, 31) = 0.1303
				Tukey's mulriple comparisons test	Male:Naïve vs. Male:F0 Unpaired	0.9997
					Male:Naïve vs. Male:F0 Paired	<0.0001
					Male:Naïve vs. Male:F1 Unpaired	0.9965
					Male:Naïve vs. Male:F1 Paired	0.0235
					Male:Naïve vs. Female:Naïve	>0.9999
					Male:Naïve vs. Female:F0 Unpaired	>0.9999
					Male:Naïve vs. Female:F0 Paired	<0.0001
					Male:Naïve vs. Female:F1 Unpaired	0.9997
					Male:Naïve vs. Female:F1 Paired	0.0051
					Male:F0 Unpaired vs. Male:F0 Paired	<0.0001
					Male:F0 Unpaired vs. Male:F1 Unpaired	>0.9999
					Male:F0 Unpaired vs. Male:F1 Paired	0.0029
					Male:F0 Unpaired vs. Female:Naïve	0.9994
					Male:F0 Unpaired vs. Female:F0 Unpaired	>0.9999
					Male:F0 Unpaired vs. Female:F0 Paired	<0.0001
					Male:F0 Unpaired vs. Female:F1 Unpaired	>0.9999
					Male:F0 Unpaired vs. Female:F1 Paired	0.0007
					Male:F0 Paired vs. Male:F1 Unpaired	<0.0001
					Male:F0 Paired vs. Male:F1 Paired	0.262
					Male:F0 Paired vs. Female:Naïve	0.0002
					Male:F0 Paired vs. Female:F0 Unpaired	<0.0001
					Male:F0 Paired vs. Female:F0 Paired	>0.9999
					Male:F0 Paired vs. Female:F1 Unpaired	<0.0001
					Male:F0 Paired vs. Female:F1 Paired	0.3169
					Male:F1 Unpaired vs. Male:F1 Paired	0.0011
					Male:F1 Unpaired vs. Female:Naïve	0.9981
					Male:F1 Unpaired vs. Female:F0 Unpaired	>0.9999
					Male:F1 Unpaired vs. Female:F0 Paired	0.0001
					Male:F1 Unpaired vs. Female:F1 Unpaired	>0.9999
					Male:F1 Unpaired vs. Female:F1 Paired	0.0035
					Male:F1 Paired vs. Female:Naïve	0.3266
					Male:F1 Paired vs. Female:F0 Unpaired	0.1294
					Male:F1 Paired vs. Female:F0 Paired	0.6196
					Male:F1 Paired vs. Female:F1 Unpaired	0.0313
					Male:F1 Paired vs. Female:F1 Paired	>0.9999
					Female:Naïve vs. Female:F0 Unpaired	0.9997
					Female:Naïve vs. Female:F0 Paired	<0.0001
					Female:Naïve vs. Female:F1 Unpaired	0.9965
					Female:Naïve vs. Female:F1 Paired	0.0235
					Female:F0 Unpaired vs. Female:F0 Paired	<0.0001
					Female:F0 Unpaired vs. Female:F1 Unpaired	>0.9999
					Female:F0 Unpaired vs. Female:F1 Paired	0.0029
					Female:F0 Paired vs. Female:F1 Unpaired	<0.0001
					Female:F0 Paired vs. Female:F1 Paired	0.262
					Female:F1 Unpaired vs. Female:F1 Paired	0.0011

## Sheet: Figure S2
Table S2.2) Statistical Source Data Related To Figure S2
Panel	Data Analyzed	Primary Analysis	n	Post-Hoc Analysis	Comparison	P value	Statistic
A	M71 OSN Counts (by litter)	1-way ANOVA	26		Treatment	<0.0001	F (7, 18) = 13.68
				Tukey's multiple comparisons test	UP_A vs. UP_B	>0.9999
					UP_A vs. UP_C	0.9979
					UP_A vs. P_A	0.1912
					UP_A vs. P_B	0.0329
					UP_A vs. P_C	0.0041
					UP_A vs. P_D	0.0594
					UP_A vs. P_E	0.0001
					UP_B vs. UP_C	>0.9999
					UP_B vs. P_A	0.1919
					UP_B vs. P_B	0.038
					UP_B vs. P_C	0.0043
					UP_B vs. P_D	0.0566
					UP_B vs. P_E	0.0002
					UP_C vs. P_A	0.046
					UP_C vs. P_B	0.006
					UP_C vs. P_C	0.0015
					UP_C vs. P_D	0.0241
					UP_C vs. P_E	<0.0001
					P_A vs. P_B	0.9772
					P_A vs. P_C	0.1237
					P_A vs. P_D	0.7288
					P_A vs. P_E	0.0257
					P_B vs. P_C	0.3278
					P_B vs. P_D	0.9628
					P_B vs. P_E	0.1554
					P_C vs. P_D	0.9632
					P_C vs. P_E	0.9989
					P_D vs. P_E	0.9943
B	MOR23 OSN counts (by litter)	1-way ANOVA	12		Treatment	0.0004	F (3, 8) = 21.25
				Tukey's multiple comparisons test	UP_A vs. P_A	0.0008
					UP_A vs. P_B	0.0133
					UP_A vs. P_C	0.002
					P_A vs. P_B	0.9998
					P_A vs. P_C	0.9998
					P_B vs. P_C	0.9989

## Sheet: Figure S3
Table S2.3) Statistical Source Data Related To Figure S3
Panel	Data Analyzed	Primary Analysis	n	Post-Hoc Analysis	Comparison	P value	Statistic
A	42/63d M71 OSN Counts (by sex)	2-way ANOVA	26		Treatment	P=0.0123	F (3, 18) = 4.830
					Sex	P=0.9889	F (1, 18) = 0.0002000
					Treatment X Sex	P=0.3738	F (3, 18) = 1.103
				Tukey's multiple comparisons test	Male:Unpaired 42d vs. Male:Paired 42d	0.0923
					Male:Unpaired 42d vs. Male:Unpaired 63d	0.9996
					Male:Unpaired 42d vs. Male:Paired 63d	0.2162
					Male:Unpaired 42d vs. Female:Unpaired 42d	0.9977
					Male:Unpaired 42d vs. Female:Paired 42d	0.9954
					Male:Unpaired 42d vs. Female:Unpaired 63d	>0.9999
					Male:Unpaired 42d vs. Female:Paired 63d	0.1669
					Male:Paired 42d vs. Male:Unpaired 63d	0.159
					Male:Paired 42d vs. Male:Paired 63d	>0.9999
					Male:Paired 42d vs. Female:Unpaired 42d	0.5157
					Male:Paired 42d vs. Female:Paired 42d	0.766
					Male:Paired 42d vs. Female:Unpaired 63d	0.527
					Male:Paired 42d vs. Female:Paired 63d	>0.9999
					Male:Unpaired 63d vs. Male:Paired 63d	0.2448
					Male:Unpaired 63d vs. Female:Unpaired 42d	0.9753
					Male:Unpaired 63d vs. Female:Paired 42d	0.9681
					Male:Unpaired 63d vs. Female:Unpaired 63d	0.9969
					Male:Unpaired 63d vs. Female:Paired 63d	0.2004
					Male:Paired 63d vs. Female:Unpaired 42d	0.6527
					Male:Paired 63d vs. Female:Paired 42d	0.8321
					Male:Paired 63d vs. Female:Unpaired 63d	0.6315
					Male:Paired 63d vs. Female:Paired 63d	>0.9999
					Female:Unpaired 42d vs. Female:Paired 42d	>0.9999
					Female:Unpaired 42d vs. Female:Unpaired 63d	>0.9999
					Female:Unpaired 42d vs. Female:Paired 63d	0.5693
					Female:Paired 42d vs. Female:Unpaired 63d	>0.9999
					Female:Paired 42d vs. Female:Paired 63d	0.7697
					Female:Unpaired 63d vs. Female:Paired 63d	0.5569

## Sheet: Figure S4
Table S2.4) Statistical Source Data Related To Figure S4
Panel	Data Analyzed	Primary Analysis	n	Post-Hoc Analysis	Comparison	P value	Statistic
A	42d Acetophenone Avoidance (females)	Unpaired t-test	8		42d females UP n=4 vs. 42d females P n=4	0.0055	t=4.238, df=6
B	42d Acetophenone Avoidance (males)	Unpaired t-test	13		42d males UP n=6 vs. 42d males P n=7	0.6534	t=0.4615, df=11
C	63d Acetophenone Avoidance (females)	Unpaired t-test	7		63d females UP n=3 vs. 63d females P n=4	0.8762	t=0.1640, df=5
D	63d Acetophenone Avoidance (males)	Unpaired t-test	7		63d males UP n=3 vs. 63d males P n=4	0.9859	t=0.01851, df=5

## Sheet: Figure S5
Table S2.5) Statistical Source Data Related To Figure S5
Panel	Data Analyzed	Primary Analysis	n	Post-Hoc Analysis	Comparison	P value	Statistic
A	Acetophenone Avoidance (by sex)	2-way ANOVA	90		Treatment	<0.0001	F (4, 84) = 21.18
					Sex	0.8137	F (1, 84) = 0.05590
				Tukey's multiple comparisons test	Male:Naïve vs. Male:F0 Unpaired	0.9981
					Male:Naïve vs. Male:F0 Paired	<0.0001
					Male:Naïve vs. Male:F1 Unpaired	0.9995
					Male:Naïve vs. Male:F1 Paired	0.9997
					Male:Naïve vs. Female:F1 Unpaired	>0.9999
					Male:Naïve vs. Female:F1 Paired	>0.9999
					Male:F0 Unpaired vs. Male:F0 Paired	<0.0001
					Male:F0 Unpaired vs. Male:F1 Unpaired	0.9533
					Male:F0 Unpaired vs. Male:F1 Paired	0.9563
					Male:F0 Unpaired vs. Female:F1 Unpaired	0.9802
					Male:F0 Unpaired vs. Female:F1 Paired	0.9972
					Male:F0 Paired vs. Male:F1 Unpaired	<0.0001
					Male:F0 Paired vs. Male:F1 Paired	<0.0001
					Male:F0 Paired vs. Female:F1 Unpaired	<0.0001
					Male:F0 Paired vs. Female:F1 Paired	<0.0001
					Male:F1 Unpaired vs. Male:F1 Paired	>0.9999
					Male:F1 Unpaired vs. Female:F1 Unpaired	>0.9999
					Male:F1 Unpaired vs. Female:F1 Paired	>0.9999
					Male:F1 Paired vs. Female:F1 Unpaired	>0.9999
					Male:F1 Paired vs. Female:F1 Paired	>0.9999
					Female:F1 Unpaired vs. Female:F1 Paired	>0.9999
B	Acetophenone Distance Traveled (by sex)	2-way ANOVA	90		Treatment	0.0049	F (4, 84) = 4.027
					Sex	0.0261	F (1, 84) = 5.127
				Tukey's multiple comparisons test	Male:Naïve n=25 vs. Male:F0 Unpaired n=10	0.9968
					Male:Naïve n=25 vs. Male:F0 Paired n=15	0.0095
					Male:Naïve n=25 vs. Male:F1 Unpaired n=22	0.8344
					Male:Naïve n=25 vs. Male:F1 Paired n=18	>0.9999
					Male:Naïve n=25 vs. Female:F1 Unpaired n=22	0.9994
					Male:Naïve n=25 vs. Female:F1 Paired n=18	0.903
					Male:F0 Unpaired n=10 vs. Male:F0 Paired n=15	0.4378
					Male:F0 Unpaired n=10 vs. Male:F1 Unpaired n=22	>0.9999
					Male:F0 Unpaired n=10 vs. Male:F1 Paired n=18	>0.9999
					Male:F0 Unpaired n=10 vs. Female:F1 Unpaired n=22	0.9358
					Male:F0 Unpaired n=10 vs. Female:F1 Paired n=18	0.6459
					Male:F0 Paired n=15 vs. Male:F1 Unpaired n=22	0.7658
					Male:F0 Paired n=15 vs. Male:F1 Paired n=18	0.0946
					Male:F0 Paired n=15 vs. Female:F1 Unpaired n=22	0.0054
					Male:F0 Paired n=15 vs. Female:F1 Paired n=18	0.0038
					Male:F1 Unpaired n=22 vs. Male:F1 Paired n=18	0.98
					Male:F1 Unpaired n=22 vs. Female:F1 Unpaired n=22	0.4229
					Male:F1 Unpaired n=22 vs. Female:F1 Paired n=18	0.5697
					Male:F1 Paired n=18 vs. Female:F1 Unpaired n=22	0.9866
					Male:F1 Paired n=18 vs. Female:F1 Paired n=18	0.4229
					Female:F1 Unpaired n=22 vs. Female:F1 Paired n=18	0.98
C	Acetophenone Time Freezing (by sex)	2-way ANOVA	90		Treatment	0.0008	F (4, 84) = 5.229
					Sex	0.5149	F (1, 84) = 0.4277
				Tukey's multiple comparisons test	Male:Naïve n=25 vs. Male:F0 Unpaired n=10	0.9987
					Male:Naïve n=25 vs. Male:F0 Paired n=15	0.0104
					Male:Naïve n=25 vs. Male:F1 Unpaired n=22	0.9972
					Male:Naïve n=25 vs. Male:F1 Paired n=18	>0.9999
					Male:Naïve n=25 vs. Female:F1 Unpaired n=22	>0.9999
					Male:Naïve n=25 vs. Female:F1 Paired n=18	>0.9999
					Male:F0 Unpaired n=10 vs. Male:F0 Paired n=15	0.3969
					Male:F0 Unpaired n=10 vs. Male:F1 Unpaired n=22	0.9267
					Male:F0 Unpaired n=10 vs. Male:F1 Paired n=18	0.9942
					Male:F0 Unpaired n=10 vs. Female:F1 Unpaired n=22	0.9968
					Male:F0 Unpaired n=10 vs. Female:F1 Paired n=18	>0.9999
					Male:F0 Paired n=15 vs. Male:F1 Unpaired n=22	0.0055
					Male:F0 Paired n=15 vs. Male:F1 Paired n=18	0.0125
					Male:F0 Paired n=15 vs. Female:F1 Unpaired n=22	0.0239
					Male:F0 Paired n=15 vs. Female:F1 Paired n=18	0.3531
					Male:F1 Unpaired n=22 vs. Male:F1 Paired n=18	0.9998
					Male:F1 Unpaired n=22 vs. Female:F1 Unpaired n=22	0.9997
					Male:F1 Unpaired n=22 vs. Female:F1 Paired n=18	0.9988
					Male:F1 Paired n=18 vs. Female:F1 Unpaired n=22	>0.9999
					Male:F1 Paired n=18 vs. Female:F1 Paired n=18	0.9997
					Female:F1 Unpaired n=22 vs. Female:F1 Paired n=18	0.9998
D	Lyral Avoidance (by sex)	2-way ANOVA	66		Treatment	<0.0001	F (4, 56) = 9.155
					Sex	0.9573	F (1, 56) = 0.002895
				Tukey's multiple comparisons test	Male:Naïve vs. Male:F0 Unpaired	>0.9999
					Male:Naïve vs. Male:F0 Paired	0.2402
					Male:Naïve vs. Male:F1 Unpaired	>0.9999
					Male:Naïve vs. Male:F1 Paired n=20	>0.9999
					Male:Naïve vs. Female:Naïve	>0.9999
					Male:Naïve vs. Female:F0 Unpaired	>0.9999
					Male:Naïve vs. Female:F0 Paired	0.3575
					Male:Naïve vs. Female:F1 Unpaired	>0.9999
					Male:Naïve vs. Female:F1 Paired n=20	>0.9999
					Male:F0 Unpaired vs. Male:F0 Paired	0.0168
					Male:F0 Unpaired vs. Male:F1 Unpaired	>0.9999
					Male:F0 Unpaired vs. Male:F1 Paired n=20	>0.9999
					Male:F0 Unpaired vs. Female:Naïve	>0.9999
					Male:F0 Unpaired vs. Female:F0 Unpaired	>0.9999
					Male:F0 Unpaired vs. Female:F0 Paired	0.0163
					Male:F0 Unpaired vs. Female:F1 Unpaired	>0.9999
					Male:F0 Unpaired vs. Female:F1 Paired n=20	>0.9999
					Male:F0 Paired vs. Male:F1 Unpaired	0.056
					Male:F0 Paired vs. Male:F1 Paired n=20	0.1232
					Male:F0 Paired vs. Female:Naïve	0.0521
					Male:F0 Paired vs. Female:F0 Unpaired	0.2147
					Male:F0 Paired vs. Female:F0 Paired	>0.9999
					Male:F0 Paired vs. Female:F1 Unpaired	0.7497
					Male:F0 Paired vs. Female:F1 Paired n=20	0.0237
					Male:F1 Unpaired vs. Male:F1 Paired n=20	>0.9999
					Male:F1 Unpaired vs. Female:Naïve	>0.9999
					Male:F1 Unpaired vs. Female:F0 Unpaired	>0.9999
					Male:F1 Unpaired vs. Female:F0 Paired	0.082
					Male:F1 Unpaired vs. Female:F1 Unpaired	>0.9999
					Male:F1 Unpaired vs. Female:F1 Paired n=20	>0.9999
					Male:F1 Paired n=20 vs. Female:Naïve	>0.9999
					Male:F1 Paired n=20 vs. Female:F0 Unpaired	>0.9999
					Male:F1 Paired n=20 vs. Female:F0 Paired	0.1756
					Male:F1 Paired n=20 vs. Female:F1 Unpaired	>0.9999
					Male:F1 Paired n=20 vs. Female:F1 Paired n=20	>0.9999
					Female:Naïve vs. Female:F0 Unpaired	>0.9999
					Female:Naïve vs. Female:F0 Paired	0.0723
					Female:Naïve vs. Female:F1 Unpaired	>0.9999
					Female:Naïve vs. Female:F1 Paired n=20	>0.9999
					Female:F0 Unpaired vs. Female:F0 Paired	0.3008
					Female:F0 Unpaired vs. Female:F1 Unpaired	>0.9999
					Female:F0 Unpaired vs. Female:F1 Paired n=20	>0.9999
					Female:F0 Paired vs. Female:F1 Unpaired	0.9017
					Female:F0 Paired vs. Female:F1 Paired n=20	0.0271
					Female:F1 Unpaired vs. Female:F1 Paired n=20	>0.9999
E	Lyral Distance Traveled (by sex)	2-way ANOVA	66		Treatment	<0.0001	F (4, 60) = 24.88
					Sex	0.016	F (1, 60) = 6.150
				Tukey's multiple comparisons test	Male:Naïve n=10 vs. Male:F0 Unpaired n=17	>0.9999
					Male:Naïve n=10 vs. Male:F0 Paired n=20	0.9839
					Male:Naïve n=10 vs. Male:F1 Unpaired n=6	0.2033
					Male:Naïve n=10 vs. Male:F1 Paired n=13	<0.0001
					Male:Naïve n=10 vs. Female:Naïve n=10	0.3001
					Male:Naïve n=10 vs. Female:F0 Unpaired n=17	0.9905
					Male:Naïve n=10 vs. Female:F0 Paired n=20	>0.9999
					Male:Naïve n=10 vs. Female:F1 Unpaired n=6	0.0376
					Male:Naïve n=10 vs. Female:F1 Paired n=13	<0.0001
					Male:F0 Unpaired n=17 vs. Male:F0 Paired n=20	0.9975
					Male:F0 Unpaired n=17 vs. Male:F1 Unpaired n=6	0.0589
					Male:F0 Unpaired n=17 vs. Male:F1 Paired n=13	<0.0001
					Male:F0 Unpaired n=17 vs. Female:Naïve n=10	0.8233
					Male:F0 Unpaired n=17 vs. Female:F0 Unpaired n=17	0.3001
					Male:F0 Unpaired n=17 vs. Female:F0 Paired n=20	0.9966
					Male:F0 Unpaired n=17 vs. Female:F1 Unpaired n=6	0.0088
					Male:F0 Unpaired n=17 vs. Female:F1 Paired n=13	<0.0001
					Male:F0 Paired n=20 vs. Male:F1 Unpaired n=6	0.0102
					Male:F0 Paired n=20 vs. Male:F1 Paired n=13	<0.0001
					Male:F0 Paired n=20 vs. Female:Naïve n=10	0.4897
					Male:F0 Paired n=20 vs. Female:F0 Unpaired n=17	0.5759
					Male:F0 Paired n=20 vs. Female:F0 Paired n=20	0.3001
					Male:F0 Paired n=20 vs. Female:F1 Unpaired n=6	0.0027
					Male:F0 Paired n=20 vs. Female:F1 Paired n=13	<0.0001
					Male:F1 Unpaired n=6 vs. Male:F1 Paired n=13	0.1505
					Male:F1 Unpaired n=6 vs. Female:Naïve n=10	0.929
					Male:F1 Unpaired n=6 vs. Female:F0 Unpaired n=17	0.7649
					Male:F1 Unpaired n=6 vs. Female:F0 Paired n=20	0.3422
					Male:F1 Unpaired n=6 vs. Female:F1 Unpaired n=6	0.3001
					Male:F1 Unpaired n=6 vs. Female:F1 Paired n=13	0.0115
					Male:F1 Paired n=13 vs. Female:Naïve n=10	0.0018
					Male:F1 Paired n=13 vs. Female:F0 Unpaired n=17	0.0002
					Male:F1 Paired n=13 vs. Female:F0 Paired n=20	<0.0001
					Male:F1 Paired n=13 vs. Female:F1 Unpaired n=6	0.9376
					Male:F1 Paired n=13 vs. Female:F1 Paired n=13	0.3001
					Female:Naïve n=10 vs. Female:F0 Unpaired n=17	>0.9999
					Female:Naïve n=10 vs. Female:F0 Paired n=20	0.9839
					Female:Naïve n=10 vs. Female:F1 Unpaired n=6	0.2033
					Female:Naïve n=10 vs. Female:F1 Paired n=13	<0.0001
					Female:F0 Unpaired n=17 vs. Female:F0 Paired n=20	0.9975
					Female:F0 Unpaired n=17 vs. Female:F1 Unpaired n=6	0.0589
					Female:F0 Unpaired n=17 vs. Female:F1 Paired n=13	<0.0001
					Female:F0 Paired n=20 vs. Female:F1 Unpaired n=6	0.0102
					Female:F0 Paired n=20 vs. Female:F1 Paired n=13	<0.0001
					Female:F1 Unpaired n=6 vs. Female:F1 Paired n=13	0.1505
F	Lyral Time Freezing (by sex)	2-way ANOVA	66		Treatment	0.0013	F (4, 60) = 5.089
					Sex	0.0938	F (1, 60) = 2.900
				Tukey's multiple comparisons test	Male:Naïve n=10 vs. Male:F0 Unpaired n=17	0.2146
					Male:Naïve n=10 vs. Male:F0 Paired n=20	0.0714
					Male:Naïve n=10 vs. Male:F1 Unpaired n=6	>0.9999
					Male:Naïve n=10 vs. Male:F1 Paired n=13	>0.9999
					Male:Naïve n=10 vs. Female:Naïve n=10	0.7895
					Male:Naïve n=10 vs. Female:F0 Unpaired n=17	0.9425
					Male:Naïve n=10 vs. Female:F0 Paired n=20	0.7318
					Male:Naïve n=10 vs. Female:F1 Unpaired n=6	0.9994
					Male:Naïve n=10 vs. Female:F1 Paired n=13	0.999
					Male:F0 Unpaired n=17 vs. Male:F0 Paired n=20	>0.9999
					Male:F0 Unpaired n=17 vs. Male:F1 Unpaired n=6	0.4678
					Male:F0 Unpaired n=17 vs. Male:F1 Paired n=13	0.1983
					Male:F0 Unpaired n=17 vs. Female:Naïve n=10	0.065
					Male:F0 Unpaired n=17 vs. Female:F0 Unpaired n=17	0.7895
					Male:F0 Unpaired n=17 vs. Female:F0 Paired n=20	0.9996
					Male:F0 Unpaired n=17 vs. Female:F1 Unpaired n=6	0.2128
					Male:F0 Unpaired n=17 vs. Female:F1 Paired n=13	0.0536
					Male:F0 Paired n=20 vs. Male:F1 Unpaired n=6	0.2558
					Male:F0 Paired n=20 vs. Male:F1 Paired n=13	0.0556
					Male:F0 Paired n=20 vs. Female:Naïve n=10	0.0349
					Male:F0 Paired n=20 vs. Female:F0 Unpaired n=17	0.9409
					Male:F0 Paired n=20 vs. Female:F0 Paired n=20	0.7895
					Male:F0 Paired n=20 vs. Female:F1 Unpaired n=6	0.1366
					Male:F0 Paired n=20 vs. Female:F1 Paired n=13	0.0274
					Male:F1 Unpaired n=6 vs. Male:F1 Paired n=13	>0.9999
					Male:F1 Unpaired n=6 vs. Female:Naïve n=10	0.9985
					Male:F1 Unpaired n=6 vs. Female:F0 Unpaired n=17	0.9715
					Male:F1 Unpaired n=6 vs. Female:F0 Paired n=20	0.8516
					Male:F1 Unpaired n=6 vs. Female:F1 Unpaired n=6	0.7895
					Male:F1 Unpaired n=6 vs. Female:F1 Paired n=13	0.9994
					Male:F1 Paired n=13 vs. Female:Naïve n=10	0.9915
					Male:F1 Paired n=13 vs. Female:F0 Unpaired n=17	0.9616
					Male:F1 Paired n=13 vs. Female:F0 Paired n=20	0.7677
					Male:F1 Paired n=13 vs. Female:F1 Unpaired n=6	0.9978
					Male:F1 Paired n=13 vs. Female:F1 Paired n=13	0.7895
					Female:Naïve n=10 vs. Female:F0 Unpaired n=17	0.2146
					Female:Naïve n=10 vs. Female:F0 Paired n=20	0.0714
					Female:Naïve n=10 vs. Female:F1 Unpaired n=6	>0.9999
					Female:Naïve n=10 vs. Female:F1 Paired n=13	>0.9999
					Female:F0 Unpaired n=17 vs. Female:F0 Paired n=20	>0.9999
					Female:F0 Unpaired n=17 vs. Female:F1 Unpaired n=6	0.4678
					Female:F0 Unpaired n=17 vs. Female:F1 Paired n=13	0.1983
					Female:F0 Paired n=20 vs. Female:F1 Unpaired n=6	0.2558
					Female:F0 Paired n=20 vs. Female:F1 Paired n=13	0.0556
					Female:F1 Unpaired n=6 vs. Female:F1 Paired n=13	>0.9999
G	Propanol Avoidance (by sex)	2-way ANOVA	82		Treatment	<0.0001	F (4, 86) = 42.09
					Sex	0.4375	F (1, 86) = 0.6085
				Tukey's multiple comparisons test	Male:Naïve vs. Male:F0 Unpaired	0.9998
					Male:Naïve vs. Male:F0 Paired	<0.0001
					Male:Naïve vs. Male:F1 Unpaired	0.1732
					Male:Naïve vs. Male:F1 Paired	>0.9999
					Male:Naïve vs. Female:F0 Unpaired	>0.9999
					Male:Naïve vs. Female:F0 Paired	<0.0001
					Male:Naïve vs. Female:F1 Unpaired	0.5837
					Male:Naïve vs. Female:F1 Paired	0.9953
					Male:F0 Unpaired vs. Male:F0 Paired	<0.0001
					Male:F0 Unpaired vs. Male:F1 Unpaired	0.6351
					Male:F0 Unpaired vs. Male:F1 Paired	0.9961
					Male:F0 Unpaired vs. Female:F0 Unpaired	0.9987
					Male:F0 Unpaired vs. Female:F0 Paired	<0.0001
					Male:F0 Unpaired vs. Female:F1 Unpaired	0.9641
					Male:F0 Unpaired vs. Female:F1 Paired	0.9589
					Male:F0 Paired vs. Male:F1 Unpaired	<0.0001
					Male:F0 Paired vs. Male:F1 Paired	<0.0001
					Male:F0 Paired vs. Female:F0 Unpaired	<0.0001
					Male:F0 Paired vs. Female:F0 Paired	0.9987
					Male:F0 Paired vs. Female:F1 Unpaired	<0.0001
					Male:F0 Paired vs. Female:F1 Paired	<0.0001
					Male:F1 Unpaired vs. Male:F1 Paired	0.0658
					Male:F1 Unpaired vs. Female:F0 Unpaired	0.7799
					Male:F1 Unpaired vs. Female:F0 Paired	<0.0001
					Male:F1 Unpaired vs. Female:F1 Unpaired	0.9987
					Male:F1 Unpaired vs. Female:F1 Paired	0.2902
					Male:F1 Paired vs. Female:F0 Unpaired	>0.9999
					Male:F1 Paired vs. Female:F0 Paired	<0.0001
					Male:F1 Paired vs. Female:F1 Unpaired	0.5585
					Male:F1 Paired vs. Female:F1 Paired	0.9987
					Female:F0 Unpaired vs. Female:F0 Paired	<0.0001
					Female:F0 Unpaired vs. Female:F1 Unpaired	0.6351
					Female:F0 Unpaired vs. Female:F1 Paired	0.9961
					Female:F0 Paired vs. Female:F1 Unpaired	<0.0001
					Female:F0 Paired vs. Female:F1 Paired	<0.0001
					Female:F1 Unpaired vs. Female:F1 Paired	0.0658
H	Propanol Distance Traveled (by sex)	2-way ANOVA	82		Treatment	<0.0001	F (4, 76) = 13.18
					Sex	0.0005	F (1, 76) = 13.29
				Tukey's multiple comparisons test	Male:Naïve n=25 vs. Male:F0 Unpaired n=13	0.0257
					Male:Naïve n=25 vs. Male:F0 Paired n=18	<0.0001
					Male:Naïve n=25 vs. Male:F1 Unpaired n=13	>0.9999
					Male:Naïve n=25 vs. Male:F1 Paired n=13	0.0113
					Male:Naïve n=25 vs. Female:F0 Unpaired n=13	>0.9999
					Male:Naïve n=25 vs. Female:F0 Paired n=18	0.86
					Male:Naïve n=25 vs. Female:F1 Unpaired n=13	0.1113
					Male:Naïve n=25 vs. Female:F1 Paired n=13	>0.9999
					Male:F0 Unpaired n=13 vs. Male:F0 Paired n=18	0.4093
					Male:F0 Unpaired n=13 vs. Male:F1 Unpaired n=13	0.4496
					Male:F0 Unpaired n=13 vs. Male:F1 Paired n=13	>0.9999
					Male:F0 Unpaired n=13 vs. Female:F0 Unpaired n=13	0.0165
					Male:F0 Unpaired n=13 vs. Female:F0 Paired n=18	0.9951
					Male:F0 Unpaired n=13 vs. Female:F1 Unpaired n=13	<0.0001
					Male:F0 Unpaired n=13 vs. Female:F1 Paired n=13	0.3345
					Male:F0 Paired n=18 vs. Male:F1 Unpaired n=13	0.0017
					Male:F0 Paired n=18 vs. Male:F1 Paired n=13	0.729
					Male:F0 Paired n=18 vs. Female:F0 Unpaired n=13	0.0024
					Male:F0 Paired n=18 vs. Female:F0 Paired n=18	0.0165
					Male:F0 Paired n=18 vs. Female:F1 Unpaired n=13	<0.0001
					Male:F0 Paired n=18 vs. Female:F1 Paired n=13	0.0014
					Male:F1 Unpaired n=13 vs. Male:F1 Paired n=13	0.1664
					Male:F1 Unpaired n=13 vs. Female:F0 Unpaired n=13	>0.9999
					Male:F1 Unpaired n=13 vs. Female:F0 Paired n=18	0.9992
					Male:F1 Unpaired n=13 vs. Female:F1 Unpaired n=13	0.0165
					Male:F1 Unpaired n=13 vs. Female:F1 Paired n=13	>0.9999
					Male:F1 Paired n=13 vs. Female:F0 Unpaired n=13	0.2962
					Male:F1 Paired n=13 vs. Female:F0 Paired n=18	0.9838
					Male:F1 Paired n=13 vs. Female:F1 Unpaired n=13	<0.0001
					Male:F1 Paired n=13 vs. Female:F1 Paired n=13	0.0165
					Female:F0 Unpaired n=13 vs. Female:F0 Paired n=18	0.4093
					Female:F0 Unpaired n=13 vs. Female:F1 Unpaired n=13	0.4496
					Female:F0 Unpaired n=13 vs. Female:F1 Paired n=13	>0.9999
					Female:F0 Paired n=18 vs. Female:F1 Unpaired n=13	0.0017
					Female:F0 Paired n=18 vs. Female:F1 Paired n=13	0.729
					Female:F1 Unpaired n=13 vs. Female:F1 Paired n=13	0.1664
I	Propanol Time Freezing (by sex)	2-way ANOVA	82		Treatment	<0.0001	F (4, 76) = 11.19
					Sex	0.3945	F (1, 76) = 0.7334
				Tukey's multiple comparisons test	Male:Naïve n=25 vs. Male:F0 Unpaired n=13	0.8003
					Male:Naïve n=25 vs. Male:F0 Paired n=18	<0.0001
					Male:Naïve n=25 vs. Male:F1 Unpaired n=13	>0.9999
					Male:Naïve n=25 vs. Male:F1 Paired n=13	0.9992
					Male:Naïve n=25 vs. Female:F0 Unpaired n=13	>0.9999
					Male:Naïve n=25 vs. Female:F0 Paired n=18	0.0196
					Male:Naïve n=25 vs. Female:F1 Unpaired n=13	>0.9999
					Male:Naïve n=25 vs. Female:F1 Paired n=13	>0.9999
					Male:F0 Unpaired n=13 vs. Male:F0 Paired n=18	0.0106
					Male:F0 Unpaired n=13 vs. Male:F1 Unpaired n=13	0.998
					Male:F0 Unpaired n=13 vs. Male:F1 Paired n=13	0.9986
					Male:F0 Unpaired n=13 vs. Female:F0 Unpaired n=13	0.9973
					Male:F0 Unpaired n=13 vs. Female:F0 Paired n=18	0.5535
					Male:F0 Unpaired n=13 vs. Female:F1 Unpaired n=13	0.8597
					Male:F0 Unpaired n=13 vs. Female:F1 Paired n=13	0.951
					Male:F0 Paired n=18 vs. Male:F1 Unpaired n=13	0.0029
					Male:F0 Paired n=18 vs. Male:F1 Paired n=13	0.0009
					Male:F0 Paired n=18 vs. Female:F0 Unpaired n=13	0.041
					Male:F0 Paired n=18 vs. Female:F0 Paired n=18	0.9973
					Male:F0 Paired n=18 vs. Female:F1 Unpaired n=13	<0.0001
					Male:F0 Paired n=18 vs. Female:F1 Paired n=13	0.0013
					Male:F1 Unpaired n=13 vs. Male:F1 Paired n=13	>0.9999
					Male:F1 Unpaired n=13 vs. Female:F0 Unpaired n=13	>0.9999
					Male:F1 Unpaired n=13 vs. Female:F0 Paired n=18	0.5081
					Male:F1 Unpaired n=13 vs. Female:F1 Unpaired n=13	0.9973
					Male:F1 Unpaired n=13 vs. Female:F1 Paired n=13	>0.9999
					Male:F1 Paired n=13 vs. Female:F0 Unpaired n=13	>0.9999
					Male:F1 Paired n=13 vs. Female:F0 Paired n=18	0.3449
					Male:F1 Paired n=13 vs. Female:F1 Unpaired n=13	0.9989
					Male:F1 Paired n=13 vs. Female:F1 Paired n=13	0.9973
					Female:F0 Unpaired n=13 vs. Female:F0 Paired n=18	0.0106
					Female:F0 Unpaired n=13 vs. Female:F1 Unpaired n=13	0.998
					Female:F0 Unpaired n=13 vs. Female:F1 Paired n=13	0.9986
					Female:F0 Paired n=18 vs. Female:F1 Unpaired n=13	0.0029
					Female:F0 Paired n=18 vs. Female:F1 Paired n=13	0.0009
					Female:F1 Unpaired n=13 vs. Female:F1 Paired n=13	>0.9999

## Sheet: Figure S6
Table S2.6) Statistical Source Data Related To Figure S6
Panel	Data Analyzed	Primary Analysis	n	Post-Hoc Analysis	Comparison	P value	Statistic
A	Acetophenone Avoidance (by litter)	One-way ANOVA	40		Treatment	0.487	F (7, 32) = 0.9444
				Tukey's multiple comparisons test	UP_A vs. UP_B	0.9997
					UP_A vs. UP_C	0.9969
					UP_A vs. UP_D	>0.9999
					UP_A vs. P_A	0.997
					UP_A vs. P_B	0.7153
					UP_A vs. P_C	>0.9999
					UP_A vs. P_D	>0.9999
					UP_B vs. UP_C	0.9115
					UP_B vs. UP_D	0.9997
					UP_B vs. P_A	>0.9999
					UP_B vs. P_B	0.471
					UP_B vs. P_C	0.9997
					UP_B vs. P_D	0.9914
					UP_C vs. UP_D	0.994
					UP_C vs. P_A	0.8519
					UP_C vs. P_B	0.8902
					UP_C vs. P_C	0.985
					UP_C vs. P_D	0.9998
					UP_D vs. P_A	0.9966
					UP_D vs. P_B	0.6703
					UP_D vs. P_C	>0.9999
					UP_D vs. P_D	>0.9999
					P_A vs. P_B	0.4137
					P_A vs. P_C	0.9964
					P_A vs. P_D	0.9716
					P_B vs. P_C	0.6046
					P_B vs. P_D	0.7873
					P_C vs. P_D	>0.9999
B	Lyral Avoidance (by litter)	One-way ANOVA	19		Treatment	0.9939	F (3, 15) = 0.02653
				Tukey's multiple comparisons test	UP_A vs. UP_B	>0.9999
					UP_A vs. P_A	0.9987
					UP_A vs. P_B	0.9994
					UP_B vs. P_A	0.9938
					UP_B vs. P_B	0.9983
					P_A vs. P_B	>0.9999
C	Propanol Avoidance (by litter)	One-way ANOVA	26		Treatment	0.0199	F (5, 20) = 3.485
				Tukey's multiple comparisons test	UP_A vs. UP_B	0.0547
					UP_A vs. UP_C	0.0306
					UP_A vs. P_A	0.0978
					UP_A vs. P_B	0.0088
					UP_A vs. P_C	0.041
					UP_B vs. UP_C	0.9793
					UP_B vs. P_A	0.9449
					UP_B vs. P_B	0.6707
					UP_B vs. P_C	>0.9999
					UP_C vs. P_A	0.9972
					UP_C vs. P_B	0.9795
					UP_C vs. P_C	0.9901
					P_A vs. P_B	>0.9999
					P_A vs. P_C	0.9595
					P_B vs. P_C	0.7228

## Sheet: Figure S7
Table S2.7) Statistical Source Data Related To Figure S7
Panel	Data Analyzed	Primary Analysis	n	Post-Hoc Analysis	Comparison	P value	Statistic
A	Acetophenone Mean Speed	1-way ANOVA	90		Treatment	0.003	F (4, 85) = 4.340
				Tukey's multiple comparisons test	Naïve n=25 vs. F0 Unpaired n=10	0.8957
					Naïve n=25 vs. F0 Paired n=15	0.0024
					Naïve n=25 vs. F1 Unpaired n=22	0.9891
					Naïve n=25 vs. F1 Paired n=18	0.9999
					F0 Unpaired n=10 vs. F0 Paired n=15	0.1815
					F0 Unpaired n=10 vs. F1 Unpaired n=22	0.9854
					F0 Unpaired n=10 vs. F1 Paired n=18	0.9467
					F0 Paired n=15 vs. F1 Unpaired n=22	0.0121
					F0 Paired n=15 vs. F1 Paired n=18	0.0081
					F1 Unpaired n=22 vs. F1 Paired n=18	0.9983
B	Acetophenone Entries	2-way ANOVA	90		Treatment	0.0174	F (4, 170) = 3.088
					Odor	0.1339	F (1, 170) = 2.269
				Tukey's multiple comparisons test	Naïve n=25:Control odor vs. Naïve n=25:Conditioned odor	>0.9999
					Naïve n=25:Control odor vs. F0 Unpaired n=10:Control odor	>0.9999
					Naïve n=25:Control odor vs. F0 Unpaired n=10:Conditioned odor	>0.9999
					Naïve n=25:Control odor vs. F0 Paired n=15:Control odor	>0.9999
					Naïve n=25:Control odor vs. F0 Paired n=15:Conditioned odor	0.0022
					Naïve n=25:Control odor vs. F1 Unpaired n=22:Control odor	0.9925
					Naïve n=25:Control odor vs. F1 Unpaired n=22:Conditioned odor	0.9912
					Naïve n=25:Control odor vs. F1 Paired n=18:Control odor	0.9998
					Naïve n=25:Control odor vs. F1 Paired n=18:Conditioned odor	0.9987
					Naïve n=25:Conditioned odor vs. F0 Unpaired n=10:Control odor	>0.9999
					Naïve n=25:Conditioned odor vs. F0 Unpaired n=10:Conditioned odor	>0.9999
					Naïve n=25:Conditioned odor vs. F0 Paired n=15:Control odor	>0.9999
					Naïve n=25:Conditioned odor vs. F0 Paired n=15:Conditioned odor	0.0005
					Naïve n=25:Conditioned odor vs. F1 Unpaired n=22:Control odor	0.9284
					Naïve n=25:Conditioned odor vs. F1 Unpaired n=22:Conditioned odor	0.9217
					Naïve n=25:Conditioned odor vs. F1 Paired n=18:Control odor	0.9924
					Naïve n=25:Conditioned odor vs. F1 Paired n=18:Conditioned odor	0.9762
					F0 Unpaired n=10:Control odor vs. F0 Unpaired n=10:Conditioned odor	>0.9999
					F0 Unpaired n=10:Control odor vs. F0 Paired n=15:Control odor	>0.9999
					F0 Unpaired n=10:Control odor vs. F0 Paired n=15:Conditioned odor	0.0303
					F0 Unpaired n=10:Control odor vs. F1 Unpaired n=22:Control odor	0.998
					F0 Unpaired n=10:Control odor vs. F1 Unpaired n=22:Conditioned odor	0.9976
					F0 Unpaired n=10:Control odor vs. F1 Paired n=18:Control odor	>0.9999
					F0 Unpaired n=10:Control odor vs. F1 Paired n=18:Conditioned odor	0.9996
					F0 Unpaired n=10:Conditioned odor vs. F0 Paired n=15:Control odor	>0.9999
					F0 Unpaired n=10:Conditioned odor vs. F0 Paired n=15:Conditioned odor	0.0158
					F0 Unpaired n=10:Conditioned odor vs. F1 Unpaired n=22:Control odor	0.9884
					F0 Unpaired n=10:Conditioned odor vs. F1 Unpaired n=22:Conditioned odor	0.9871
					F0 Unpaired n=10:Conditioned odor vs. F1 Paired n=18:Control odor	0.999
					F0 Unpaired n=10:Conditioned odor vs. F1 Paired n=18:Conditioned odor	0.9963
					F0 Paired n=15:Control odor vs. F0 Paired n=15:Conditioned odor	0.0139
					F0 Paired n=15:Control odor vs. F1 Unpaired n=22:Control odor	0.9988
					F0 Paired n=15:Control odor vs. F1 Unpaired n=22:Conditioned odor	0.9985
					F0 Paired n=15:Control odor vs. F1 Paired n=18:Control odor	>0.9999
					F0 Paired n=15:Control odor vs. F1 Paired n=18:Conditioned odor	0.9998
					F0 Paired n=15:Conditioned odor vs. F1 Unpaired n=22:Control odor	0.0559
					F0 Paired n=15:Conditioned odor vs. F1 Unpaired n=22:Conditioned odor	0.059
					F0 Paired n=15:Conditioned odor vs. F1 Paired n=18:Control odor	0.0358
					F0 Paired n=15:Conditioned odor vs. F1 Paired n=18:Conditioned odor	0.0563
					F1 Unpaired n=22:Control odor vs. F1 Unpaired n=22:Conditioned odor	>0.9999
					F1 Unpaired n=22:Control odor vs. F1 Paired n=18:Control odor	>0.9999
					F1 Unpaired n=22:Control odor vs. F1 Paired n=18:Conditioned odor	>0.9999
					F1 Unpaired n=22:Conditioned odor vs. F1 Paired n=18:Control odor	>0.9999
					F1 Unpaired n=22:Conditioned odor vs. F1 Paired n=18:Conditioned odor	>0.9999
					F1 Paired n=18:Control odor vs. F1 Paired n=18:Conditioned odor	>0.9999
C	Acetophenone Time Spent	2-way ANOVA	90		Treatment	0.0022	F (4, 170) = 4.371
					Odor	0.0053	F (1, 170) = 7.992
				Tukey's multiple comparisons test	Naïve n=25:Control odor vs. Naïve n=25:Conditioned odor	>0.9999
					Naïve n=25:Control odor vs. F0 Unpaired n=10:Control odor	>0.9999
					Naïve n=25:Control odor vs. F0 Unpaired n=10:Conditioned odor	0.9951
					Naïve n=25:Control odor vs. F0 Paired n=15:Control odor	0.9996
					Naïve n=25:Control odor vs. F0 Paired n=15:Conditioned odor	<0.0001
					Naïve n=25:Control odor vs. F1 Unpaired n=22:Control odor	>0.9999
					Naïve n=25:Control odor vs. F1 Unpaired n=22:Conditioned odor	>0.9999
					Naïve n=25:Control odor vs. F1 Paired n=18:Control odor	>0.9999
					Naïve n=25:Control odor vs. F1 Paired n=18:Conditioned odor	0.9999
					Naïve n=25:Conditioned odor vs. F0 Unpaired n=10:Control odor	>0.9999
					Naïve n=25:Conditioned odor vs. F0 Unpaired n=10:Conditioned odor	0.9952
					Naïve n=25:Conditioned odor vs. F0 Paired n=15:Control odor	0.9996
					Naïve n=25:Conditioned odor vs. F0 Paired n=15:Conditioned odor	<0.0001
					Naïve n=25:Conditioned odor vs. F1 Unpaired n=22:Control odor	>0.9999
					Naïve n=25:Conditioned odor vs. F1 Unpaired n=22:Conditioned odor	>0.9999
					Naïve n=25:Conditioned odor vs. F1 Paired n=18:Control odor	>0.9999
					Naïve n=25:Conditioned odor vs. F1 Paired n=18:Conditioned odor	0.9999
					F0 Unpaired n=10:Control odor vs. F0 Unpaired n=10:Conditioned odor	0.9963
					F0 Unpaired n=10:Control odor vs. F0 Paired n=15:Control odor	>0.9999
					F0 Unpaired n=10:Control odor vs. F0 Paired n=15:Conditioned odor	0.0002
					F0 Unpaired n=10:Control odor vs. F1 Unpaired n=22:Control odor	>0.9999
					F0 Unpaired n=10:Control odor vs. F1 Unpaired n=22:Conditioned odor	>0.9999
					F0 Unpaired n=10:Control odor vs. F1 Paired n=18:Control odor	>0.9999
					F0 Unpaired n=10:Control odor vs. F1 Paired n=18:Conditioned odor	>0.9999
					F0 Unpaired n=10:Conditioned odor vs. F0 Paired n=15:Control odor	0.9265
					F0 Unpaired n=10:Conditioned odor vs. F0 Paired n=15:Conditioned odor	0.0105
					F0 Unpaired n=10:Conditioned odor vs. F1 Unpaired n=22:Control odor	0.9999
					F0 Unpaired n=10:Conditioned odor vs. F1 Unpaired n=22:Conditioned odor	0.9947
					F0 Unpaired n=10:Conditioned odor vs. F1 Paired n=18:Control odor	0.9914
					F0 Unpaired n=10:Conditioned odor vs. F1 Paired n=18:Conditioned odor	0.9415
					F0 Paired n=15:Control odor vs. F0 Paired n=15:Conditioned odor	<0.0001
					F0 Paired n=15:Control odor vs. F1 Unpaired n=22:Control odor	0.9896
					F0 Paired n=15:Control odor vs. F1 Unpaired n=22:Conditioned odor	0.9998
					F0 Paired n=15:Control odor vs. F1 Paired n=18:Control odor	>0.9999
					F0 Paired n=15:Control odor vs. F1 Paired n=18:Conditioned odor	>0.9999
					F0 Paired n=15:Conditioned odor vs. F1 Unpaired n=22:Control odor	<0.0001
					F0 Paired n=15:Conditioned odor vs. F1 Unpaired n=22:Conditioned odor	<0.0001
					F0 Paired n=15:Conditioned odor vs. F1 Paired n=18:Control odor	<0.0001
					F0 Paired n=15:Conditioned odor vs. F1 Paired n=18:Conditioned odor	<0.0001
					F1 Unpaired n=22:Control odor vs. F1 Unpaired n=22:Conditioned odor	>0.9999
					F1 Unpaired n=22:Control odor vs. F1 Paired n=18:Control odor	>0.9999
					F1 Unpaired n=22:Control odor vs. F1 Paired n=18:Conditioned odor	0.9938
					F1 Unpaired n=22:Conditioned odor vs. F1 Paired n=18:Control odor	>0.9999
					F1 Unpaired n=22:Conditioned odor vs. F1 Paired n=18:Conditioned odor	>0.9999
					F1 Paired n=18:Control odor vs. F1 Paired n=18:Conditioned odor	>0.9999
D	Lyral Mean Speed	1-way ANOVA	66		Treatment	<0.0001	F (4, 61) = 22.17
				Tukey's multiple comparisons test	Naïve n=10 vs. F0 Unpaired n=17	0.9943
					Naïve n=10 vs. F0 Paired n=20	0.8986
					Naïve n=10 vs. F1 Unpaired n=6	0.1519
					Naïve n=10 vs. F1 Paired n=13	<0.0001
					F0 Unpaired n=17 vs. F0 Paired n=20	0.9802
					F0 Unpaired n=17 vs. F1 Unpaired n=6	0.0438
					F0 Unpaired n=17 vs. F1 Paired n=13	<0.0001
					F0 Paired n=20 vs. F1 Unpaired n=6	0.0128
					F0 Paired n=20 vs. F1 Paired n=13	<0.0001
					F1 Unpaired n=6 vs. F1 Paired n=13	0.0315
E	Lyral Entries	2-way ANOVA	66		Treatment	<0.0001	F (4, 122) = 20.61
					Odor	0.6465	F (1, 122) = 0.2114
				Tukey's multiple comparisons test	Naïve n=10:Control odor vs. Naïve n=10:Conditioned odor	0.5082
					Naïve n=10:Control odor vs. F0 Unpaired n=17:Control odor	>0.9999
					Naïve n=10:Control odor vs. F0 Unpaired n=17:Conditioned odor	>0.9999
					Naïve n=10:Control odor vs. F0 Paired n=20:Control odor	0.9988
					Naïve n=10:Control odor vs. F0 Paired n=20:Conditioned odor	0.9901
					Naïve n=10:Control odor vs. F1 Unpaired n=6:Control odor	0.5879
					Naïve n=10:Control odor vs. F1 Unpaired n=6:Conditioned odor	0.74
					Naïve n=10:Control odor vs. F1 Paired n=13:Control odor	0.0004
					Naïve n=10:Control odor vs. F1 Paired n=13:Conditioned odor	0.0001
					Naïve n=10:Conditioned odor vs. F0 Unpaired n=17:Control odor	0.2137
					Naïve n=10:Conditioned odor vs. F0 Unpaired n=17:Conditioned odor	0.4691
					Naïve n=10:Conditioned odor vs. F0 Paired n=20:Control odor	0.8003
					Naïve n=10:Conditioned odor vs. F0 Paired n=20:Conditioned odor	0.0228
					Naïve n=10:Conditioned odor vs. F1 Unpaired n=6:Control odor	>0.9999
					Naïve n=10:Conditioned odor vs. F1 Unpaired n=6:Conditioned odor	>0.9999
					Naïve n=10:Conditioned odor vs. F1 Paired n=13:Control odor	0.3601
					Naïve n=10:Conditioned odor vs. F1 Paired n=13:Conditioned odor	0.2068
					F0 Unpaired n=17:Control odor vs. F0 Unpaired n=17:Conditioned odor	>0.9999
					F0 Unpaired n=17:Control odor vs. F0 Paired n=20:Control odor	0.971
					F0 Unpaired n=17:Control odor vs. F0 Paired n=20:Conditioned odor	0.9957
					F0 Unpaired n=17:Control odor vs. F1 Unpaired n=6:Control odor	0.3373
					F0 Unpaired n=17:Control odor vs. F1 Unpaired n=6:Conditioned odor	0.4978
					F0 Unpaired n=17:Control odor vs. F1 Paired n=13:Control odor	<0.0001
					F0 Unpaired n=17:Control odor vs. F1 Paired n=13:Conditioned odor	<0.0001
					F0 Unpaired n=17:Conditioned odor vs. F0 Paired n=20:Control odor	0.9997
					F0 Unpaired n=17:Conditioned odor vs. F0 Paired n=20:Conditioned odor	0.9083
					F0 Unpaired n=17:Conditioned odor vs. F1 Unpaired n=6:Control odor	0.5839
					F0 Unpaired n=17:Conditioned odor vs. F1 Unpaired n=6:Conditioned odor	0.7486
					F0 Unpaired n=17:Conditioned odor vs. F1 Paired n=13:Control odor	<0.0001
					F0 Unpaired n=17:Conditioned odor vs. F1 Paired n=13:Conditioned odor	<0.0001
					F0 Paired n=20:Control odor vs. F0 Paired n=20:Conditioned odor	0.458
					F0 Paired n=20:Control odor vs. F1 Unpaired n=6:Control odor	0.8486
					F0 Paired n=20:Control odor vs. F1 Unpaired n=6:Conditioned odor	0.9419
					F0 Paired n=20:Control odor vs. F1 Paired n=13:Control odor	0.0004
					F0 Paired n=20:Control odor vs. F1 Paired n=13:Conditioned odor	<0.0001
					F0 Paired n=20:Conditioned odor vs. F1 Unpaired n=6:Control odor	0.0714
					F0 Paired n=20:Conditioned odor vs. F1 Unpaired n=6:Conditioned odor	0.1349
					F0 Paired n=20:Conditioned odor vs. F1 Paired n=13:Control odor	<0.0001
					F0 Paired n=20:Conditioned odor vs. F1 Paired n=13:Conditioned odor	<0.0001
					F1 Unpaired n=6:Control odor vs. F1 Unpaired n=6:Conditioned odor	>0.9999
					F1 Unpaired n=6:Control odor vs. F1 Paired n=13:Control odor	0.7143
					F1 Unpaired n=6:Control odor vs. F1 Paired n=13:Conditioned odor	0.5459
					F1 Unpaired n=6:Conditioned odor vs. F1 Paired n=13:Control odor	0.5523
					F1 Unpaired n=6:Conditioned odor vs. F1 Paired n=13:Conditioned odor	0.3856
					F1 Paired n=13:Control odor vs. F1 Paired n=13:Conditioned odor	>0.9999
F	Lyral Time Spent	2-way ANOVA	66		Treatment	0.0007	F (4, 122) = 5.208
					Odor	0.0914	F (1, 122) = 2.896
				Tukey's multiple comparisons test	Naïve n=10:Control odor vs. Naïve n=10:Conditioned odor	0.9999
					Naïve n=10:Control odor vs. F0 Unpaired n=17:Control odor	0.9148
					Naïve n=10:Control odor vs. F0 Unpaired n=17:Conditioned odor	0.8649
					Naïve n=10:Control odor vs. F0 Paired n=20:Control odor	0.6048
					Naïve n=10:Control odor vs. F0 Paired n=20:Conditioned odor	0.0068
					Naïve n=10:Control odor vs. F1 Unpaired n=6:Control odor	>0.9999
					Naïve n=10:Control odor vs. F1 Unpaired n=6:Conditioned odor	0.9645
					Naïve n=10:Control odor vs. F1 Paired n=13:Control odor	0.9878
					Naïve n=10:Control odor vs. F1 Paired n=13:Conditioned odor	0.9986
					Naïve n=10:Conditioned odor vs. F0 Unpaired n=17:Control odor	0.532
					Naïve n=10:Conditioned odor vs. F0 Unpaired n=17:Conditioned odor	0.445
					Naïve n=10:Conditioned odor vs. F0 Paired n=20:Control odor	0.9501
					Naïve n=10:Conditioned odor vs. F0 Paired n=20:Conditioned odor	0.0005
					Naïve n=10:Conditioned odor vs. F1 Unpaired n=6:Control odor	>0.9999
					Naïve n=10:Conditioned odor vs. F1 Unpaired n=6:Conditioned odor	0.9993
					Naïve n=10:Conditioned odor vs. F1 Paired n=13:Control odor	>0.9999
					Naïve n=10:Conditioned odor vs. F1 Paired n=13:Conditioned odor	>0.9999
					F0 Unpaired n=17:Control odor vs. F0 Unpaired n=17:Conditioned odor	>0.9999
					F0 Unpaired n=17:Control odor vs. F0 Paired n=20:Control odor	0.0032
					F0 Unpaired n=17:Control odor vs. F0 Paired n=20:Conditioned odor	0.1469
					F0 Unpaired n=17:Control odor vs. F1 Unpaired n=6:Control odor	0.9261
					F0 Unpaired n=17:Control odor vs. F1 Unpaired n=6:Conditioned odor	0.2542
					F0 Unpaired n=17:Control odor vs. F1 Paired n=13:Control odor	0.1644
					F0 Unpaired n=17:Control odor vs. F1 Paired n=13:Conditioned odor	0.3076
					F0 Unpaired n=17:Conditioned odor vs. F0 Paired n=20:Control odor	0.0018
					F0 Unpaired n=17:Conditioned odor vs. F0 Paired n=20:Conditioned odor	0.2064
					F0 Unpaired n=17:Conditioned odor vs. F1 Unpaired n=6:Control odor	0.8884
					F0 Unpaired n=17:Conditioned odor vs. F1 Unpaired n=6:Conditioned odor	0.2043
					F0 Unpaired n=17:Conditioned odor vs. F1 Paired n=13:Control odor	0.1192
					F0 Unpaired n=17:Conditioned odor vs. F1 Paired n=13:Conditioned odor	0.236
					F0 Paired n=20:Control odor vs. F0 Paired n=20:Conditioned odor	<0.0001
					F0 Paired n=20:Control odor vs. F1 Unpaired n=6:Control odor	0.9048
					F0 Paired n=20:Control odor vs. F1 Unpaired n=6:Conditioned odor	>0.9999
					F0 Paired n=20:Control odor vs. F1 Paired n=13:Control odor	0.9955
					F0 Paired n=20:Control odor vs. F1 Paired n=13:Conditioned odor	0.9646
					F0 Paired n=20:Conditioned odor vs. F1 Unpaired n=6:Control odor	0.0289
					F0 Paired n=20:Conditioned odor vs. F1 Unpaired n=6:Conditioned odor	0.0005
					F0 Paired n=20:Conditioned odor vs. F1 Paired n=13:Control odor	<0.0001
					F0 Paired n=20:Conditioned odor vs. F1 Paired n=13:Conditioned odor	<0.0001
					F1 Unpaired n=6:Control odor vs. F1 Unpaired n=6:Conditioned odor	0.9945
					F1 Unpaired n=6:Control odor vs. F1 Paired n=13:Control odor	0.9994
					F1 Unpaired n=6:Control odor vs. F1 Paired n=13:Conditioned odor	>0.9999
					F1 Unpaired n=6:Conditioned odor vs. F1 Paired n=13:Control odor	>0.9999
					F1 Unpaired n=6:Conditioned odor vs. F1 Paired n=13:Conditioned odor	0.9998
					F1 Paired n=13:Control odor vs. F1 Paired n=13:Conditioned odor	>0.9999
G	Propanol Mean Speed	1-way ANOVA	82		Treatment	<0.0001	F (4, 77) = 14.11
				Tukey's multiple comparisons test	Naïve n=25 vs. F0 Unpaired n=13	0.0295
					Naïve n=25 vs. F0 Paired n=18	<0.0001
					Naïve n=25 vs. F1 Unpaired n=13	0.5593
					Naïve n=25 vs. F1 Paired n=13	0.0791
					F0 Unpaired n=13 vs. F0 Paired n=18	0.1714
					F0 Unpaired n=13 vs. F1 Unpaired n=13	0.0017
					F0 Unpaired n=13 vs. F1 Paired n=13	0.9971
					F0 Paired n=18 vs. F1 Unpaired n=13	<0.0001
					F0 Paired n=18 vs. F1 Paired n=13	0.0769
					F1 Unpaired n=13 vs. F1 Paired n=13	0.0051
H	Propanol Entries	2-way ANOVA	82		Treatment	<0.0001	F (4, 154) = 18.85
					Odor	0.0435	F (1, 154) = 4.145
				Tukey's multiple comparisons test	Naïve n=25:Control odor vs. Naïve n=25:Conditioned odor	>0.9999
					Naïve n=25:Control odor vs. F0 Unpaired n=13:Control odor	0.343
					Naïve n=25:Control odor vs. F0 Unpaired n=13:Conditioned odor	0.1813
					Naïve n=25:Control odor vs. F0 Paired n=18:Control odor	0.8057
					Naïve n=25:Control odor vs. F0 Paired n=18:Conditioned odor	<0.0001
					Naïve n=25:Control odor vs. F1 Unpaired n=13:Control odor	>0.9999
					Naïve n=25:Control odor vs. F1 Unpaired n=13:Conditioned odor	0.7431
					Naïve n=25:Control odor vs. F1 Paired n=13:Control odor	0.049
					Naïve n=25:Control odor vs. F1 Paired n=13:Conditioned odor	0.0832
					Naïve n=25:Conditioned odor vs. F0 Unpaired n=13:Control odor	0.577
					Naïve n=25:Conditioned odor vs. F0 Unpaired n=13:Conditioned odor	0.361
					Naïve n=25:Conditioned odor vs. F0 Paired n=18:Control odor	0.9542
					Naïve n=25:Conditioned odor vs. F0 Paired n=18:Conditioned odor	<0.0001
					Naïve n=25:Conditioned odor vs. F1 Unpaired n=13:Control odor	0.9967
					Naïve n=25:Conditioned odor vs. F1 Unpaired n=13:Conditioned odor	0.5053
					Naïve n=25:Conditioned odor vs. F1 Paired n=13:Control odor	0.1241
					Naïve n=25:Conditioned odor vs. F1 Paired n=13:Conditioned odor	0.1934
					F0 Unpaired n=13:Control odor vs. F0 Unpaired n=13:Conditioned odor	>0.9999
					F0 Unpaired n=13:Control odor vs. F0 Paired n=18:Control odor	0.9983
					F0 Unpaired n=13:Control odor vs. F0 Paired n=18:Conditioned odor	0.0007
					F0 Unpaired n=13:Control odor vs. F1 Unpaired n=13:Control odor	0.2538
					F0 Unpaired n=13:Control odor vs. F1 Unpaired n=13:Conditioned odor	0.0135
					F0 Unpaired n=13:Control odor vs. F1 Paired n=13:Control odor	0.9993
					F0 Unpaired n=13:Control odor vs. F1 Paired n=13:Conditioned odor	>0.9999
					F0 Unpaired n=13:Conditioned odor vs. F0 Paired n=18:Control odor	0.9825
					F0 Unpaired n=13:Conditioned odor vs. F0 Paired n=18:Conditioned odor	0.0023
					F0 Unpaired n=13:Conditioned odor vs. F1 Unpaired n=13:Control odor	0.1377
					F0 Unpaired n=13:Conditioned odor vs. F1 Unpaired n=13:Conditioned odor	0.0052
					F0 Unpaired n=13:Conditioned odor vs. F1 Paired n=13:Control odor	>0.9999
					F0 Unpaired n=13:Conditioned odor vs. F1 Paired n=13:Conditioned odor	>0.9999
					F0 Paired n=18:Control odor vs. F0 Paired n=18:Conditioned odor	<0.0001
					F0 Paired n=18:Control odor vs. F1 Unpaired n=13:Control odor	0.6498
					F0 Paired n=18:Control odor vs. F1 Unpaired n=13:Conditioned odor	0.0674
					F0 Paired n=18:Control odor vs. F1 Paired n=13:Control odor	0.8478
					F0 Paired n=18:Control odor vs. F1 Paired n=13:Conditioned odor	0.9205
					F0 Paired n=18:Conditioned odor vs. F1 Unpaired n=13:Control odor	<0.0001
					F0 Paired n=18:Conditioned odor vs. F1 Unpaired n=13:Conditioned odor	<0.0001
					F0 Paired n=18:Conditioned odor vs. F1 Paired n=13:Control odor	0.013
					F0 Paired n=18:Conditioned odor vs. F1 Paired n=13:Conditioned odor	0.007
					F1 Unpaired n=13:Control odor vs. F1 Unpaired n=13:Conditioned odor	0.985
					F1 Unpaired n=13:Control odor vs. F1 Paired n=13:Control odor	0.042
					F1 Unpaired n=13:Control odor vs. F1 Paired n=13:Conditioned odor	0.0674
					F1 Unpaired n=13:Conditioned odor vs. F1 Paired n=13:Control odor	0.001
					F1 Unpaired n=13:Conditioned odor vs. F1 Paired n=13:Conditioned odor	0.0018
					F1 Paired n=13:Control odor vs. F1 Paired n=13:Conditioned odor	>0.9999
I	Propanol Time Spent	2-way ANOVA	82		Treatment	0.4521	F (4, 154) = 0.9233
					Odor	0.0016	F (1, 154) = 10.26
				Tukey's multiple comparisons test	Naïve n=25:Control odor vs. Naïve n=25:Conditioned odor	>0.9999
					Naïve n=25:Control odor vs. F0 Unpaired n=13:Control odor	0.8606
					Naïve n=25:Control odor vs. F0 Unpaired n=13:Conditioned odor	>0.9999
					Naïve n=25:Control odor vs. F0 Paired n=18:Control odor	<0.0001
					Naïve n=25:Control odor vs. F0 Paired n=18:Conditioned odor	<0.0001
					Naïve n=25:Control odor vs. F1 Unpaired n=13:Control odor	>0.9999
					Naïve n=25:Control odor vs. F1 Unpaired n=13:Conditioned odor	0.9896
					Naïve n=25:Control odor vs. F1 Paired n=13:Control odor	>0.9999
					Naïve n=25:Control odor vs. F1 Paired n=13:Conditioned odor	0.9631
					Naïve n=25:Conditioned odor vs. F0 Unpaired n=13:Control odor	0.8591
					Naïve n=25:Conditioned odor vs. F0 Unpaired n=13:Conditioned odor	>0.9999
					Naïve n=25:Conditioned odor vs. F0 Paired n=18:Control odor	<0.0001
					Naïve n=25:Conditioned odor vs. F0 Paired n=18:Conditioned odor	<0.0001
					Naïve n=25:Conditioned odor vs. F1 Unpaired n=13:Control odor	>0.9999
					Naïve n=25:Conditioned odor vs. F1 Unpaired n=13:Conditioned odor	0.9898
					Naïve n=25:Conditioned odor vs. F1 Paired n=13:Control odor	>0.9999
					Naïve n=25:Conditioned odor vs. F1 Paired n=13:Conditioned odor	0.9637
					F0 Unpaired n=13:Control odor vs. F0 Unpaired n=13:Conditioned odor	0.8587
					F0 Unpaired n=13:Control odor vs. F0 Paired n=18:Control odor	<0.0001
					F0 Unpaired n=13:Control odor vs. F0 Paired n=18:Conditioned odor	0.0039
					F0 Unpaired n=13:Control odor vs. F1 Unpaired n=13:Control odor	0.9472
					F0 Unpaired n=13:Control odor vs. F1 Unpaired n=13:Conditioned odor	0.414
					F0 Unpaired n=13:Control odor vs. F1 Paired n=13:Control odor	0.8573
					F0 Unpaired n=13:Control odor vs. F1 Paired n=13:Conditioned odor	0.3006
					F0 Unpaired n=13:Conditioned odor vs. F0 Paired n=18:Control odor	<0.0001
					F0 Unpaired n=13:Conditioned odor vs. F0 Paired n=18:Conditioned odor	<0.0001
					F0 Unpaired n=13:Conditioned odor vs. F1 Unpaired n=13:Control odor	>0.9999
					F0 Unpaired n=13:Conditioned odor vs. F1 Unpaired n=13:Conditioned odor	0.9995
					F0 Unpaired n=13:Conditioned odor vs. F1 Paired n=13:Control odor	>0.9999
					F0 Unpaired n=13:Conditioned odor vs. F1 Paired n=13:Conditioned odor	0.9968
					F0 Paired n=18:Control odor vs. F0 Paired n=18:Conditioned odor	<0.0001
					F0 Paired n=18:Control odor vs. F1 Unpaired n=13:Control odor	<0.0001
					F0 Paired n=18:Control odor vs. F1 Unpaired n=13:Conditioned odor	0.001
					F0 Paired n=18:Control odor vs. F1 Paired n=13:Control odor	<0.0001
					F0 Paired n=18:Control odor vs. F1 Paired n=13:Conditioned odor	0.0022
					F0 Paired n=18:Conditioned odor vs. F1 Unpaired n=13:Control odor	<0.0001
					F0 Paired n=18:Conditioned odor vs. F1 Unpaired n=13:Conditioned odor	<0.0001
					F0 Paired n=18:Conditioned odor vs. F1 Paired n=13:Control odor	<0.0001
					F0 Paired n=18:Conditioned odor vs. F1 Paired n=13:Conditioned odor	<0.0001
					F1 Unpaired n=13:Control odor vs. F1 Unpaired n=13:Conditioned odor	0.9945
					F1 Unpaired n=13:Control odor vs. F1 Paired n=13:Control odor	>0.9999
					F1 Unpaired n=13:Control odor vs. F1 Paired n=13:Conditioned odor	0.9803
					F1 Unpaired n=13:Conditioned odor vs. F1 Paired n=13:Control odor	0.9995
					F1 Unpaired n=13:Conditioned odor vs. F1 Paired n=13:Conditioned odor	>0.9999
					F1 Paired n=13:Control odor vs. F1 Paired n=13:Conditioned odor	0.9969
